# Supplementary material
Source: Springer Nature journal article supplement (https://www.springermedizin.de/resource/supplementary/13075_2011_3527_MOESM1_ESM.pdf/9694746)
Supplement: MOESM1 [file 9694746]

BRASS cohort  
**1095**

Patients with  $\geq 2$  years follow-up  
**871**

Patients with remission at  $\geq 1$  visits  
**550**

$\geq 1$  Year follow-up after first visit in remission

DAS28-CRP  $< 2.6$   
**515**

DAS28-CRP  $< 2.3$   
**433**

SDA  $\leq 3.3$   
**244**

CDAI  $\leq 2.8$   
**232**

ACR/EULAR remission  
**223**

Not in remission at entrance BRASS

DAS28-CRP  $< 2.6$   
**309**

DAS28-CRP  $< 2.3$   
**275**

SDA  $\leq 3.3$   
**168**

CDAI  $\leq 2.8$   
**170**

ACR/EULAR remission  
**158**
